# Supplementary material for: In Vitro and In Vivo Antifungal Profile of a Novel and Long-Acting Inhaled Azole, PC945, on Aspergillus fumigatus Infection
Source: PubMed Central journal article supplement (PMC5404542; doi:10.1128/aac.02280-16), 2017-04-24
Supplement: AAC.02280-16_zac005176125s1.pdf [file AAC.02280-16_zac005176125s1.pdf]

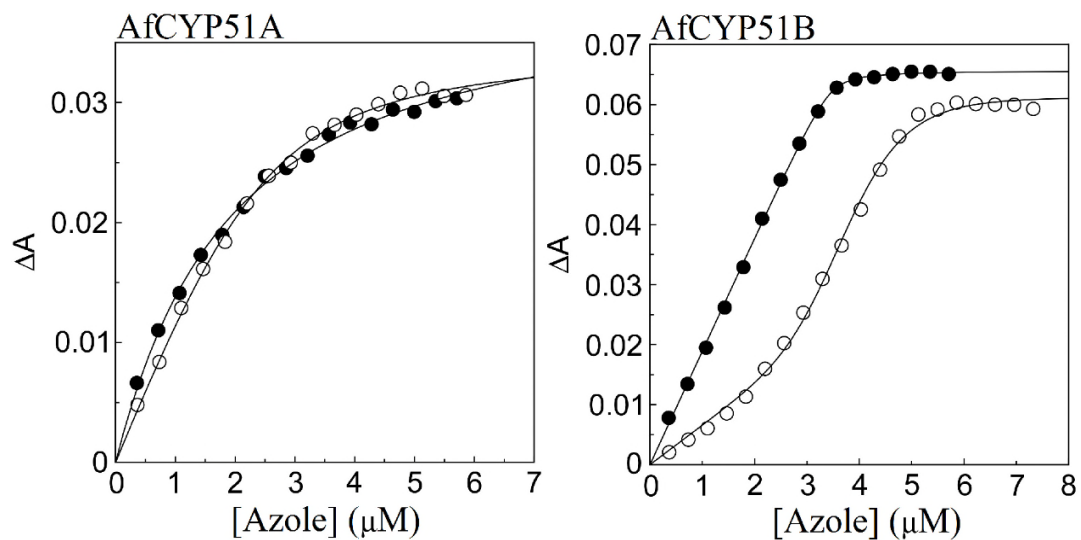

**Supplementary Figure 1. Azole binding saturation curves for *A. fumigatus* CYP51A and CYP51B.**

Saturation curves were constructed from the absorbance difference  $\Delta A_{\text{peak-trough}}$  of the type II difference spectra (Fig. 1B) for posaconazole (●) and PC945 (○). Each experiment was performed four times and PC945 binding to AfCYP51B six times, although only one replicate is shown.

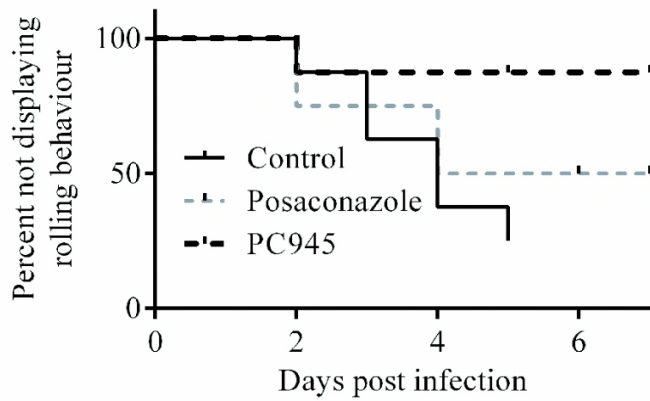

**Supplementary Figure 2. Effect of once daily intranasal treatment of PC945 (14 µg/mouse) and posaconazole (14 µg/mouse) on *A. fumigatus* infection induced rolling behaviour in *A. fumigatus* infected immunocompromised mice**

Y axis shows percentage of mice without displaying rolling behaviour. Some mice died or dropped out before displaying rolling behaviour.
